# Supplementary material
Source: PubMed Central journal article supplement (PMC10425576)

M Vglut1+

F Vglut1+

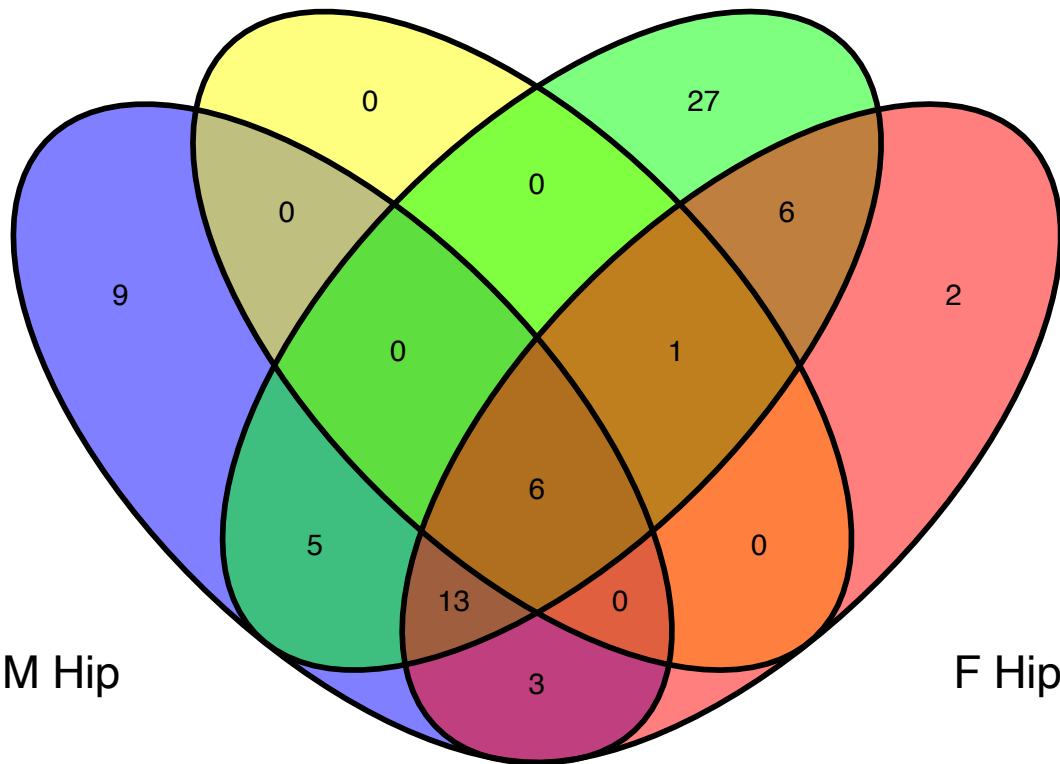

M Hip

F Hip

Supplement: NIHMS1900559-supplement-Figure_S10.pdf [file NIHMS1900559-supplement-Figure_S10.pdf]

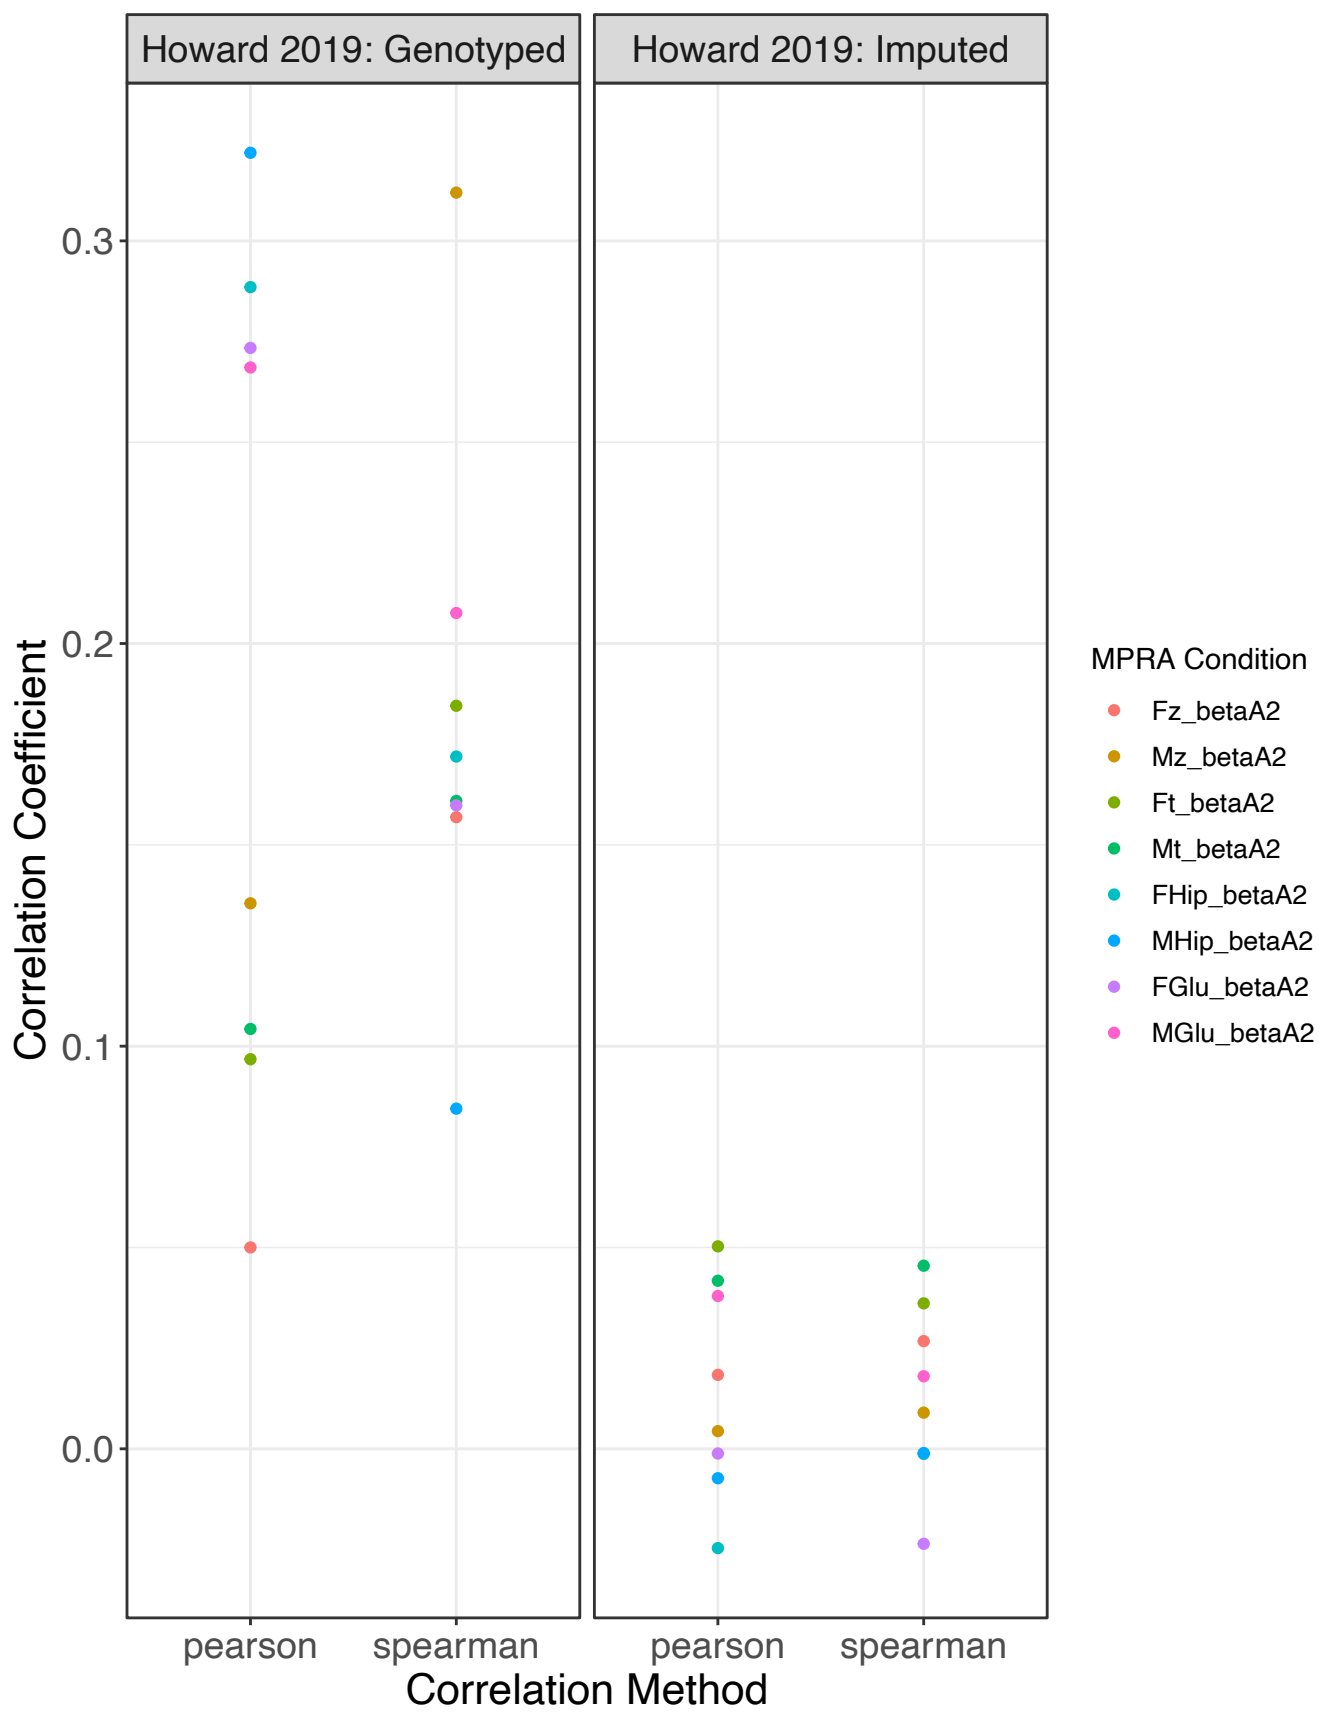

Supplement: NIHMS1900559-supplement-Figure_S14.pdf [file NIHMS1900559-supplement-Figure_S14.pdf]

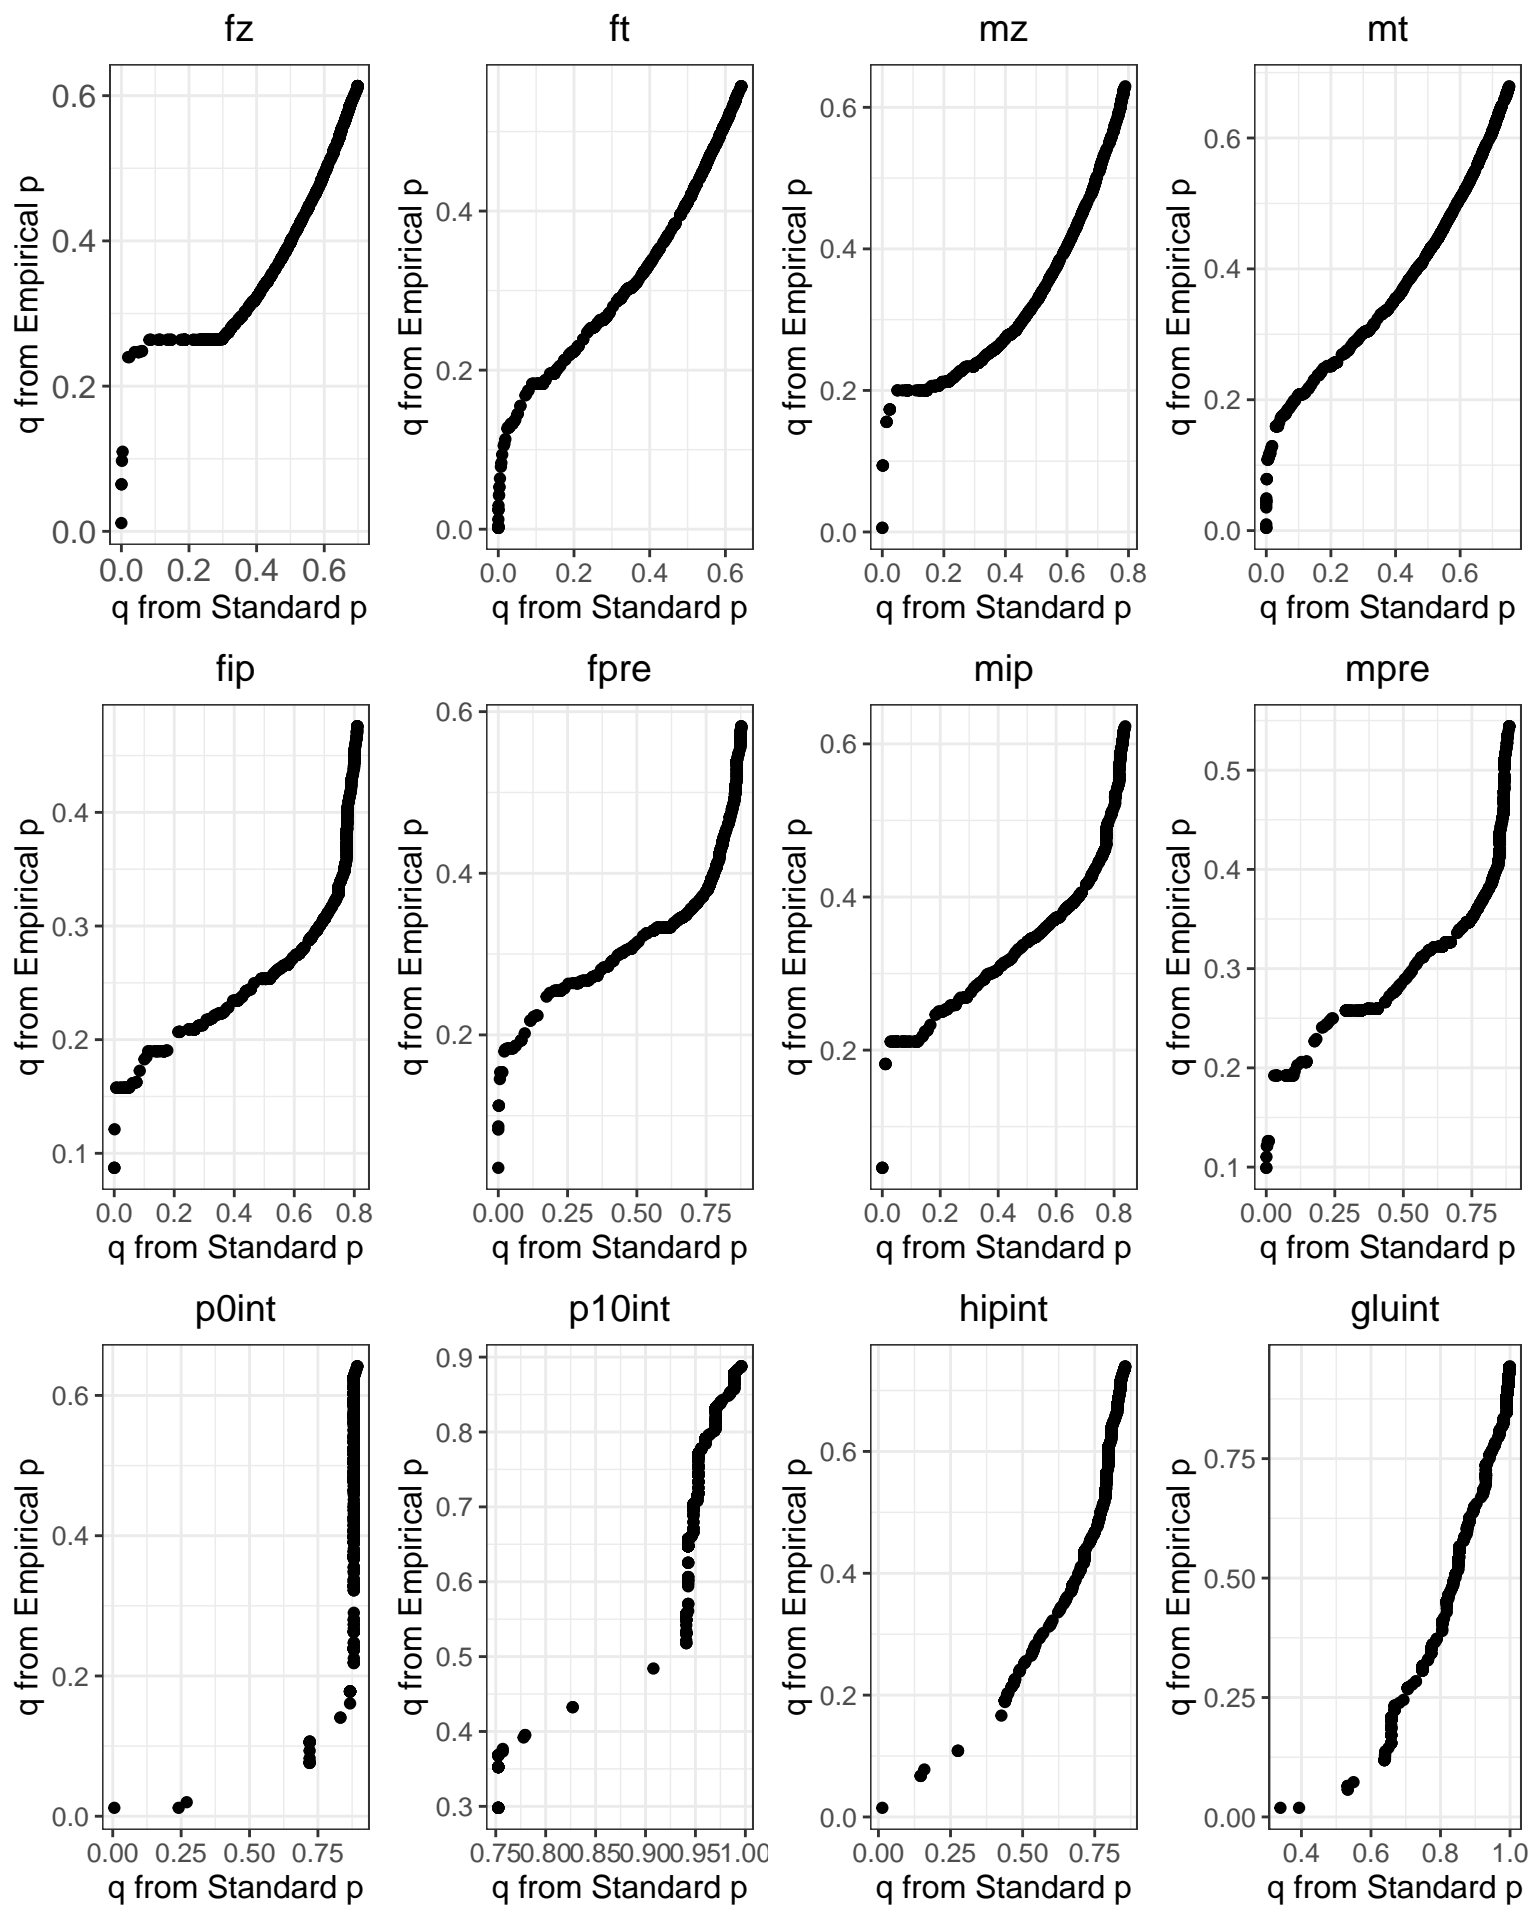

Supplement: NIHMS1900559-supplement-Figure_S7.pdf [file NIHMS1900559-supplement-Figure_S7.pdf]

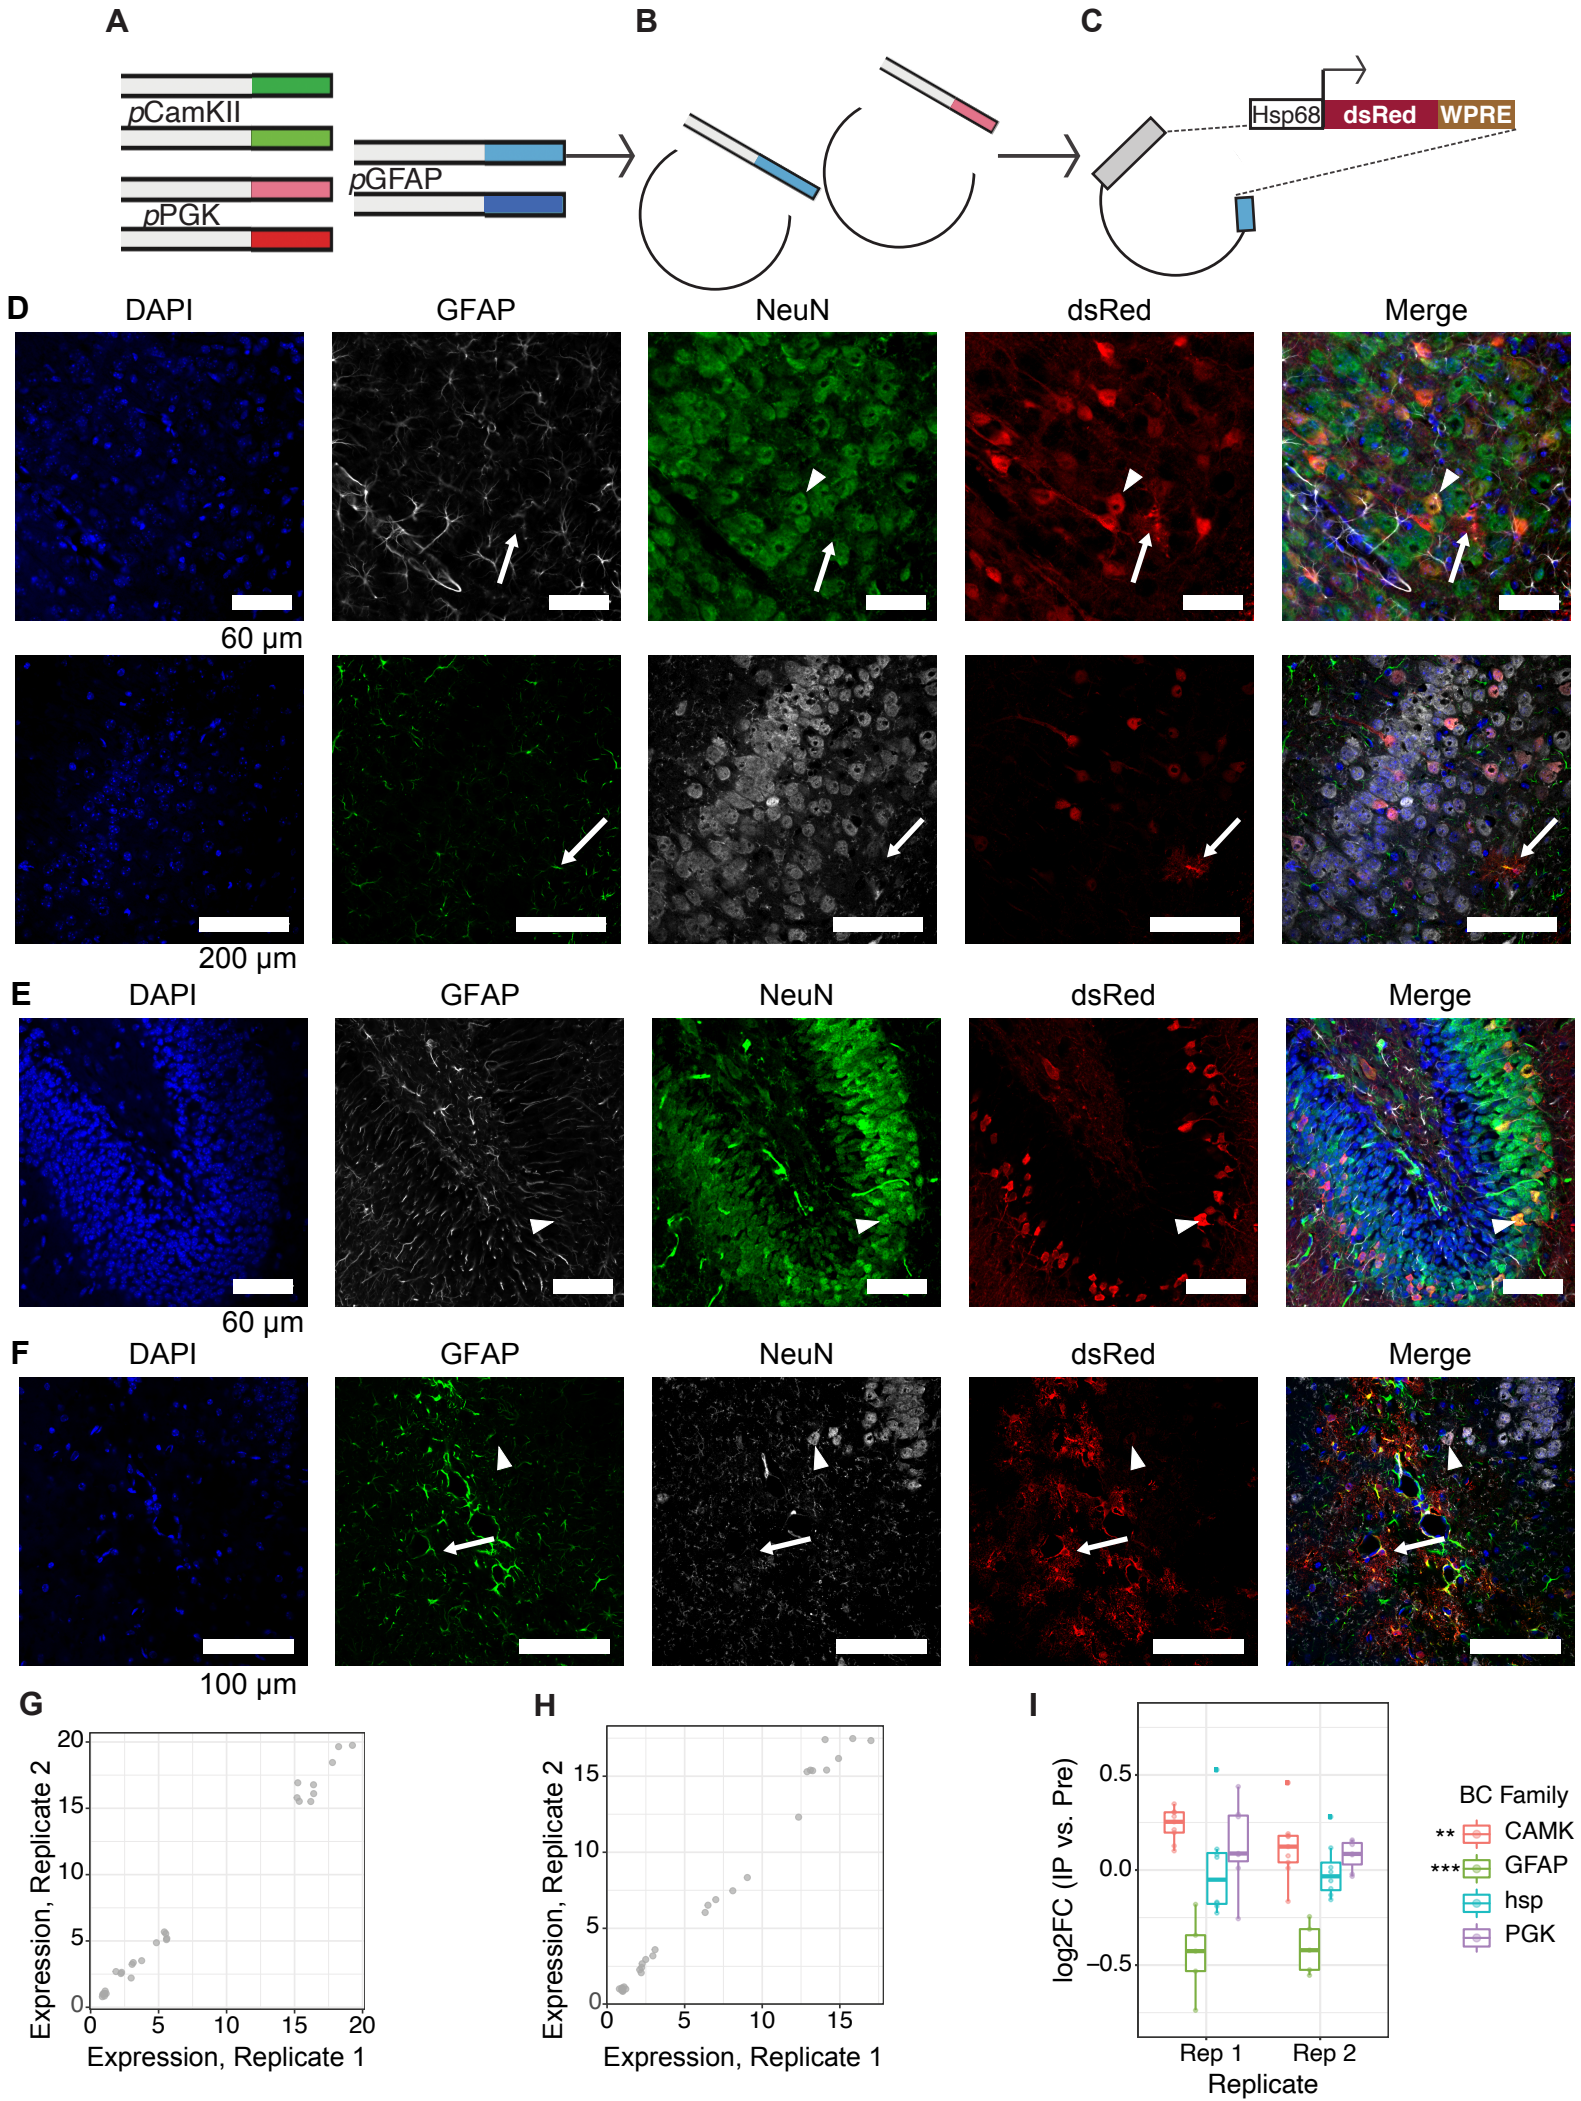

Supplement: NIHMS1900559-supplement-Figure_S8.pdf [file NIHMS1900559-supplement-Figure_S8.pdf]
